# Supplementary material
Source: PubMed Central journal article supplement (PMC8286444)

**Figure S1. Resting state network maps derived in the full cohort via independent component analysis.**

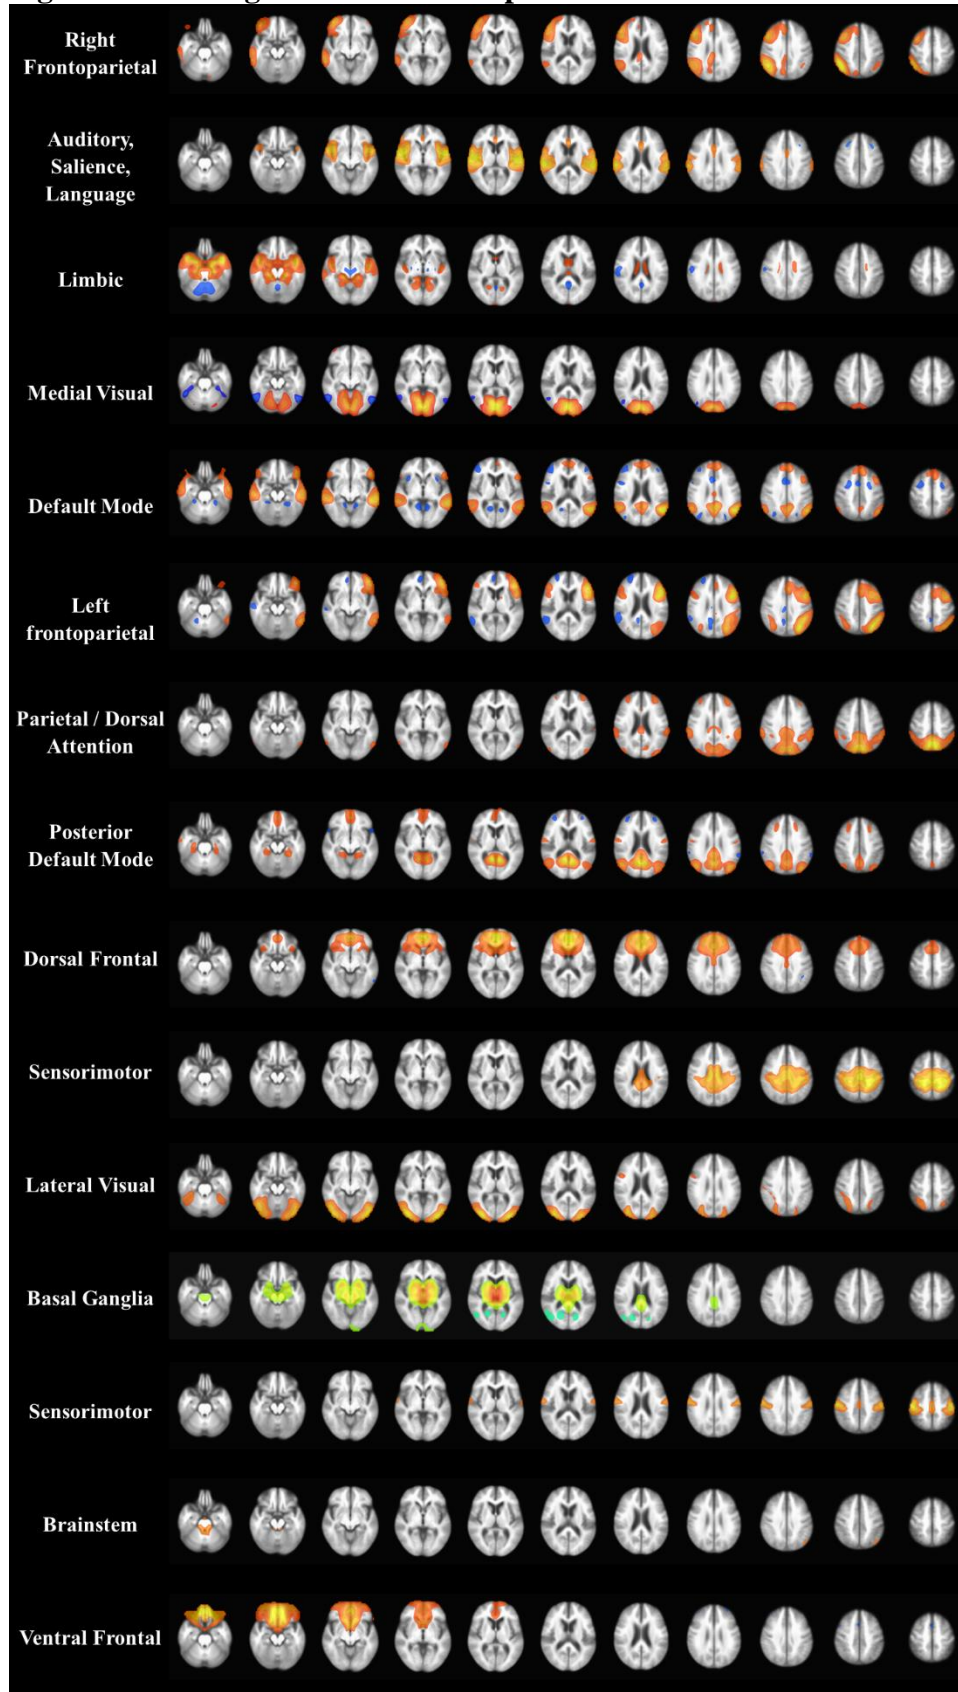

Supplement: NIHMS1684002-supplement-Fig_S1.pdf [file NIHMS1684002-supplement-Fig_S1.pdf]
