# Supplementary material
Source: PubMed Central journal article supplement (PMC8286444)

**Figure S2. Network maps for networks of interest (top) and corresponding rWML correlation t-maps (bottom).** (A) Auditory-salience-language network, (B) Default mode network, (C) Left frontoparietal network, (D) Posterior default mode network, (E) Dorsal frontal network. For the correlation t-maps (bottom row), shades of red/orange indicate positive regions of correlation, and shades of blue indicate negative regions of correlation.

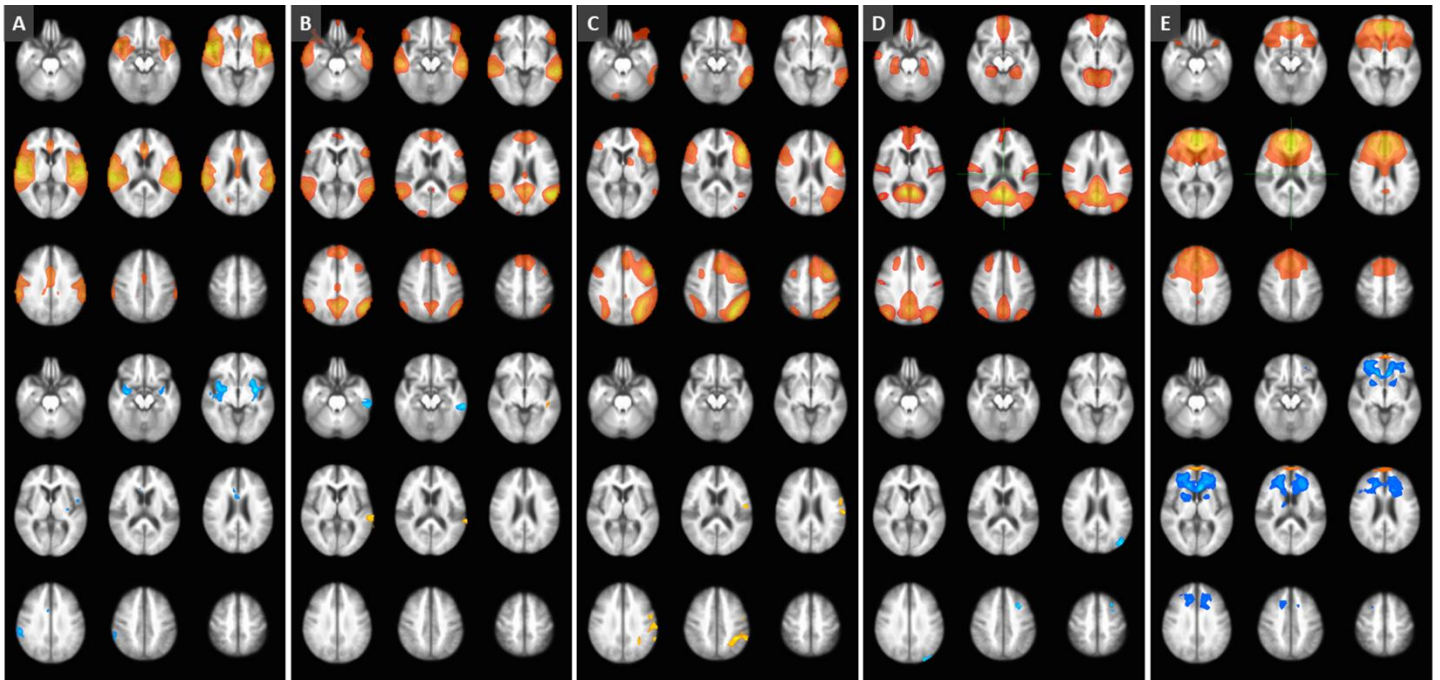

Supplement: NIHMS1684002-supplement-Fig_S2.pdf [file NIHMS1684002-supplement-Fig_S2.pdf]
