# Supplementary material
Source: PubMed Central journal article supplement (PMC8286444)
Supplement: NIHMS1684002-supplement-TS1.pdf [file NIHMS1684002-supplement-TS1.pdf]

# Changes in brain functional connectivity and cognition related to white matter lesion burden in hypertensive patients from the SPRINT trial

## Supplemental information

Table S1. Correlation between Mean Connectivity Score and White Matter Lesion Volume for Each Network

| Component Name              | R       | p       |
|-----------------------------|---------|---------|
| Right Frontoparietal        | 0.0458  | 0.2402  |
| Auditory                    | -0.1324 | 0.0007* |
| Limbic                      | 0.0159  | 0.6829  |
| Medial Visual               | 0.0271  | 0.4876  |
| Default Mode                | -0.0766 | 0.0491* |
| Left frontoparietal         | 0.0786  | 0.0436* |
| Parietal / Dorsal Attention | 0.0367  | 0.3459  |
| Posterior Default Mode      | -0.1039 | 0.0076* |
| Dorsal Frontal              | 0.0773  | 0.0472* |
| Sensorimotor                | 0.0634  | 0.1039  |
| Lateral Visual              | -0.0269 | 0.4898  |
| Basal Ganglia               | -0.0841 | 0.0307* |
| Sensorimotor                | 0.0040  | 0.9173  |
| Brainstem                   | 0.0226  | 0.5623  |
| Ventral Frontal             | 0.0551  | 0.1572  |

\* p < 0.05
