# Supplementary material
Source: PubMed Central journal article supplement (PMC8286444)
Supplement: NIHMS1684002-supplement-TS2.pdf [file NIHMS1684002-supplement-TS2.pdf]

**Table S2. Full regression model statistics for network MCS as a function of rWML.** Network MCS was modeled using multiple variable linear regression for network of interest, incorporating network-specific regional-WML (rWML) as a predictor. Each model was adjusted for gray matter ratio (GMR), age, gender and race. Nine site variables were also originally included as adjusters but were not significant for these networks and removed from the final model.

| Predictors             | Network MCS      |                  |                  |                  |                 |                  |           |          |                  |                  |
|------------------------|------------------|------------------|------------------|------------------|-----------------|------------------|-----------|----------|------------------|------------------|
|                        | ASLN             |                  | DMN              |                  | LFP             |                  | pDMN      |          | DFN              |                  |
|                        | Beta             | p value          | Beta             | p value          | Beta            | p value          | Beta      | p value  | Beta             | p value          |
| <b>rWML (network)</b>  | <b>-7.76E-07</b> | <b>0.031203*</b> | <b>-6.45E-05</b> | <b>0.018288*</b> | <b>4.85E-05</b> | <b>2.49E-06*</b> | -1.01E-06 | 1.46E-01 | <b>-9.54E-05</b> | <b>8.47E-03*</b> |
| <b>GMR</b>             | 0.018818         | 0.427716         | <b>0.059246</b>  | <b>0.005444*</b> | 0.032905        | 0.083277         | 0.018222  | 0.301413 | 0.031319         | 0.313213         |
| <b>Age</b>             | -7.54E-05        | 3.79E-01         | -3.50E-05        | 6.47E-01         | 3.19E-05        | 6.37E-01         | 1.75E-05  | 7.82E-01 | 1.74E-04         | 1.20E-01         |
| <b>Gender</b>          | -0.00071         | 0.553057         | 0.000283         | 0.792913         | -0.00154        | 0.106982         | 0.000384  | 0.666699 | -0.00195         | 0.222156         |
| <b>Race (White)</b>    | 0.004201         | 0.325152         | -0.00587         | 0.127117         | 0.006036        | 0.077825         | -0.00284  | 0.373754 | 0.010018         | 0.077783         |
| <b>Race (Black)</b>    | 0.004019         | 0.356188         | -0.00555         | 0.158339         | 0.006051        | 0.083163         | -0.0063   | 0.053229 | <b>0.012485</b>  | <b>0.031295*</b> |
| <b>Race (Hispanic)</b> | 0.007548         | 0.127305         | -0.0027          | 0.545432         | 0.005371        | 0.175632         | -0.00545  | 0.140286 | <b>0.013281</b>  | <b>0.043663*</b> |

\*p<0.05

ASLN – Auditory-Saliency-Language network; DMN – Default Mode Network; LFPN – Left Frontoparietal Network; pDMN – posterior DMN; DFN – Dorsal Frontal Network; rWML – regional white matter lesion volume (network specific); MCS – Mean connectivity score;
