# Supplementary material
Source: PubMed Central journal article supplement (PMC8286444)
Supplement: NIHMS1684002-supplement-TS3.pdf [file NIHMS1684002-supplement-TS3.pdf]

**Table S3. Full regression model statistics for network WCC as a function of rWML.** Network WCC was modeled using multiple variable linear regression for network of interest, incorporating network-specific regional-WML (rWML) as a predictor. Each model was adjusted for gray matter ratio (GMR), age, gender and race.

| Predictors             | Network WCC      |                  |                 |                  |                 |                  |                  |                  |                  |                  |
|------------------------|------------------|------------------|-----------------|------------------|-----------------|------------------|------------------|------------------|------------------|------------------|
|                        | ASLN             |                  | DMN             |                  | LFP             |                  | pDMN             |                  | DFN              |                  |
|                        | Beta             | p value          | Beta            | p value          | Beta            | p value          | Beta             | p value          | Beta             | p value          |
| <b>rWML (network)</b>  | <b>-1.90E-05</b> | <b>3.48E-10*</b> | <b>-0.00163</b> | <b>3.22E-05*</b> | <b>0.000596</b> | <b>5.69E-06*</b> | <b>-4.78E-05</b> | <b>1.55E-04*</b> | <b>-1.26E-03</b> | <b>8.54E-06*</b> |
| <b>GMR</b>             | -0.028           | 0.886909         | 0.114997        | 0.70501          | 0.232886        | 0.336177         | -0.27064         | 0.397332         | 0.302898         | 0.210073         |
| <b>Age</b>             | <b>-1.59E-03</b> | <b>2.56E-02*</b> | 1.34E-03        | 2.21E-01         | -6.20E-04       | 4.72E-01         | -3.20E-04        | 7.81E-01         | <b>2.06E-03</b>  | <b>1.83E-02*</b> |
| <b>Gender</b>          | -0.01657         | 0.094779         | -0.00361        | 0.814431         | 0.006195        | 0.611722         | 0.008521         | 0.598403         | -0.0069          | 0.578371         |
| <b>Race (White)</b>    | 0.028409         | 0.422737         | 0.015648        | 0.775956         | -0.02212        | 0.611961         | -0.02032         | 0.725319         | 0.080428         | 0.06879          |
| <b>Race (Black)</b>    | 0.028027         | 0.438165         | 0.035805        | 0.523906         | -0.03507        | 0.430757         | -0.03452         | 0.558545         | <b>0.10648</b>   | <b>0.018294*</b> |
| <b>Race (Hispanic)</b> | 0.071487         | 0.081979         | 0.088369        | 0.165997         | -0.08399        | 0.096952         | -0.0183          | 0.78478          | 0.116277         | 0.023258         |

\*p<0.05 for FC metric

ASLN – Auditory-Saliency-Language network; DMN – Default Mode Network; LFPN – Left Frontoparietal Network; rWML – regional white matter lesion volume (network specific); WCC – WML-related cluster connectivity
