# Supplementary material
Source: PubMed Central journal article supplement (PMC8286444)
Supplement: NIHMS1684002-supplement-TS4.pdf [file NIHMS1684002-supplement-TS4.pdf]

**Table S4. Full regression model statistics for cognitive test performance as a function of MCS.** Performance on the MoCA, DSC and LMT was modeled using multiple variable linear regression for each test, incorporating overall network connectivity metrics as predictors. Each model was adjusted for age, gender and race.

| Predictors             | Cognitive test  |                    |                 |                    |                 |                    |
|------------------------|-----------------|--------------------|-----------------|--------------------|-----------------|--------------------|
|                        | MoCA            |                    | DSC             |                    | LM              |                    |
|                        | Beta            | p value            | Beta            | p value            | Beta            | p value            |
| <b>FC (ASLN MCS)</b>   | 6.057183        | 0.55045652         | 71.86703        | 0.06238644         | -1.16393        | 0.89784301         |
| <b>FC (DMN MCS)</b>    | <b>33.47268</b> | <b>0.00254717*</b> | 44.07517        | 0.29196705         | 10.23109        | 0.3005564          |
| <b>FC (LFPN MCS)</b>   | -14.8289        | 0.24045355         | 7.049195        | 0.88299473         | -0.81907        | 0.94213836         |
| <b>FC (pDMN MCS)</b>   | -22.9341        | 0.09090837         | 12.53179        | 0.80698325         | 3.382644        | 0.78001543         |
| <b>FC (DFN MCS)</b>    | -6.41472        | 0.41312855         | -45.2205        | 0.12759572         | -1.69784        | 0.80845546         |
| <b>GMR</b>             | -0.02644        | 9.96E-01           | <b>54.7732</b>  | <b>0.01399044*</b> | <b>11.09776</b> | <b>0.03494298*</b> |
| <b>Age</b>             | <b>-0.10512</b> | <b>8.47E-07*</b>   | <b>-0.43469</b> | <b>7.87E-08*</b>   | <b>-0.04386</b> | <b>2.06E-02*</b>   |
| <b>Gender</b>          | -0.04875        | 0.87040824         | 0.697626        | 0.5373682          | <b>0.803885</b> | <b>2.71E-03*</b>   |
| <b>Race (White)</b>    | <b>3.065798</b> | <b>0.0042514*</b>  | <b>13.17626</b> | <b>0.00116982*</b> | <b>1.977622</b> | <b>0.03878201*</b> |
| <b>Race (Black)</b>    | -0.31355        | 0.77443249         | 1.005827        | 0.80792495         | -0.64807        | 0.5075657          |
| <b>Race (Hispanic)</b> | -0.5735         | 0.65260275         | -1.01499        | 0.83312672         | -1.17415        | 0.30262861         |

\*p<0.05 for FC metric

ASLN – Auditory-Salience-Language network; DMN – Default Mode Network; LFPN – Left Frontoparietal Network; pDMN – Posterior DMN; MCS – Mean connectivity score; MoCA - Montreal Cognitive Assessment; DSC - Digit Symbol Coding test; LM – Logical Memory Test
